# Supplementary material
Source: PubMed Central journal article supplement (PMC5136311)
Supplement: NIHMS816925-supplement-4.pdf [file NIHMS816925-supplement-4.pdf]

**Table S1**

|                                          | <b>Oncofetal CS expression</b> |            | <b>P value</b> |
|------------------------------------------|--------------------------------|------------|----------------|
|                                          | <b>High</b>                    | <b>Low</b> |                |
| <b>Age</b>                               |                                |            |                |
| ≤65 years ( n=17)                        | 12 (29%)                       | 5          | NS             |
| >65 years (n=21)                         | 15 (24%)                       | 6          |                |
| <b>Gender</b>                            |                                |            |                |
| Female (n=8)                             | 6 (63%)                        | 2          | NS             |
| Male (n=30)                              | 21 (17%)                       | 9          |                |
| <b>Tumour stage</b>                      |                                |            |                |
| Stage I/II/III (n=12)                    | 11 (42%)                       | 1          | NS             |
| Stage IV (n=25)                          | 16 (20%)                       | 9          |                |
| <b>Histology</b>                         |                                |            |                |
| Well to moderately differentiated (n=19) | 16 (26%)                       | 3          | NS             |
| Poorly differentiated (n=16)             | 10 (31%)                       | 6          |                |
| <b>No. of distant organ metastasis</b>   |                                |            |                |
| <6 (n=25)                                | 18 (20%)                       | 7          | NS             |
| ≥6 (n=13)                                | 9 (38%)                        | 4          |                |

\**P values* were calculated by Fisher's exact test.

*NS* stands for not significant.

Clinical information related to the pancreatic cancer tissue microarray and its staining with rVAR2.

### **Figure S1**

#### **SiRNA against CSGALNACT1 recapitulates phenotype seen with rVAR2 incubation**

A, MG63 cells were treated with SiRNA against CSGALNACT1 (CSGT-1) in a scratch-wound heal assay as in Fig 2A.

### **Figure S2**

#### **CS and Integrin signaling**

A, Column based pulldown of integrin subunits using rVAR2 (rV-c) from RH30 cells. Figure shows western blot analysis of eluates in increasing NaCl concentration. An rContr coupled column is used as negative control (rC-C). **B**, Quantification of PLA

co-localization analysis between of-CS (rVAR2 stain) and integrin subunits in U2OS cells. C, Quantification of PLA co-localization analysis between of-CS (rVAR2 stain) and integrin subunits in MG63 cells.

### **Figure S3**

#### **Slope analysis of subcutaneous B16 tumor initiation**

Number of mice bearing B16 xenografts tumors at different time points after inoculation. Mice received rVAR2 or rControl at days 0,6 and 9. Linear regression and slope analysis show a slower tumor initiation in the rVAR2 treated arm compared to rControl. We tested whether slopes and intercepts differ between the two groups using a covariance analysis in Prism. p-Value = 0.0082 (\*\*)
