# Supplementary material
Source: PubMed Central journal article supplement (PMC5136311)

# Figure S1

## A

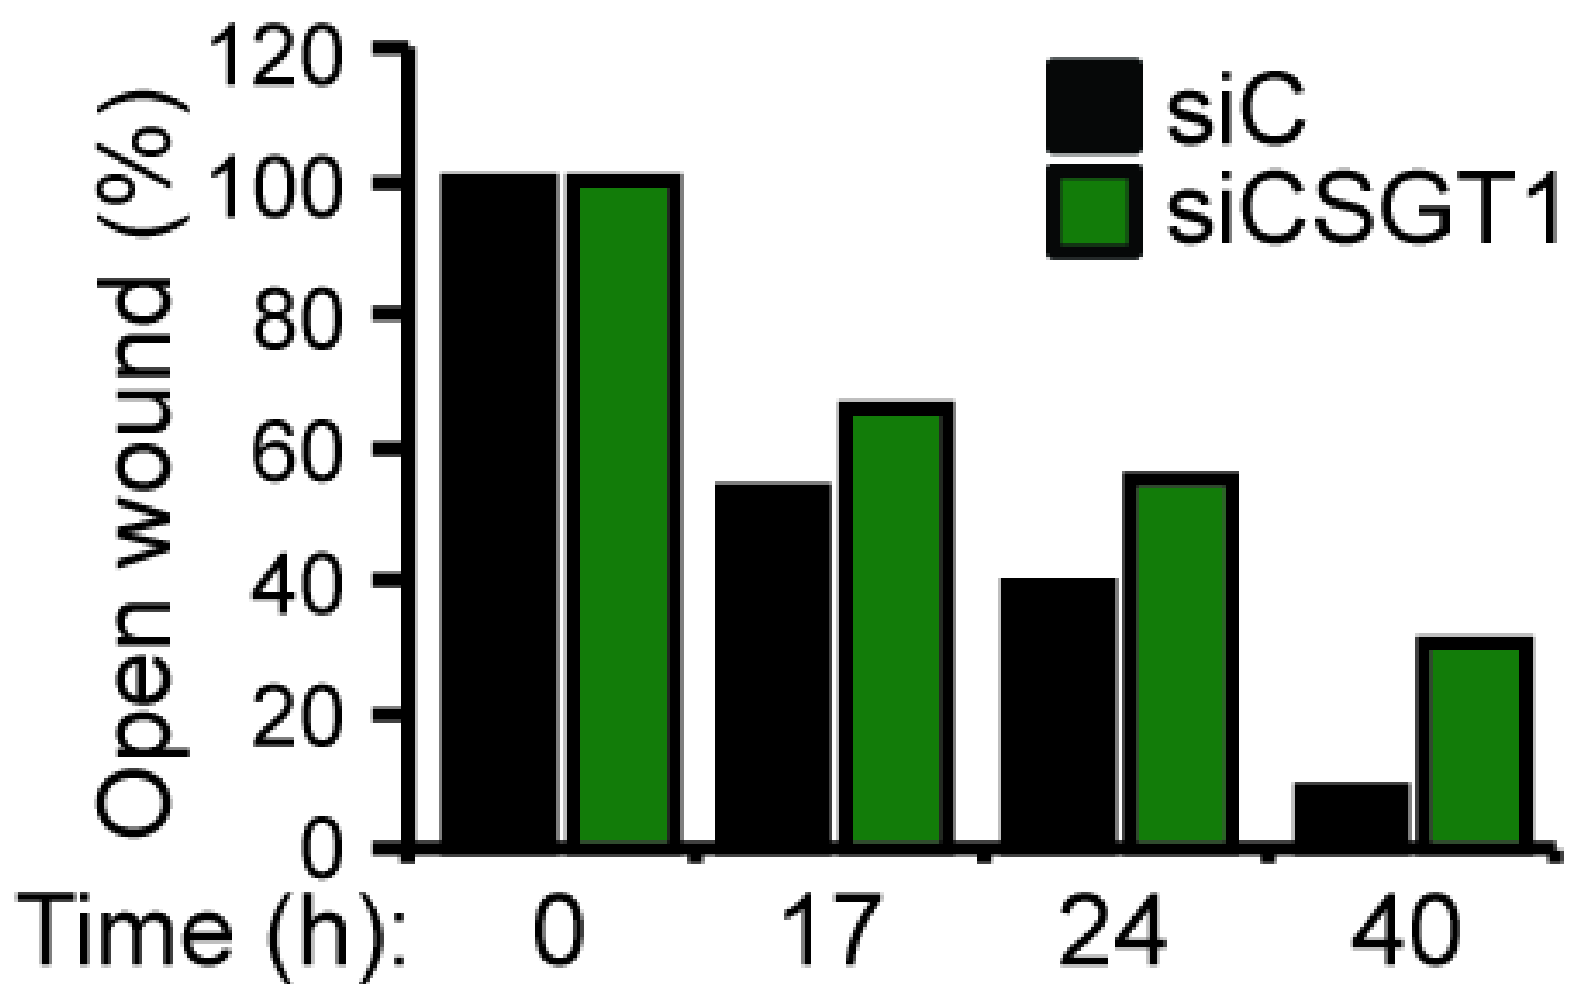

Supplement: NIHMS816925-supplement-1.pdf [file NIHMS816925-supplement-1.pdf]

Figure S2

A

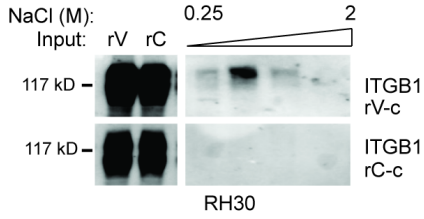

B

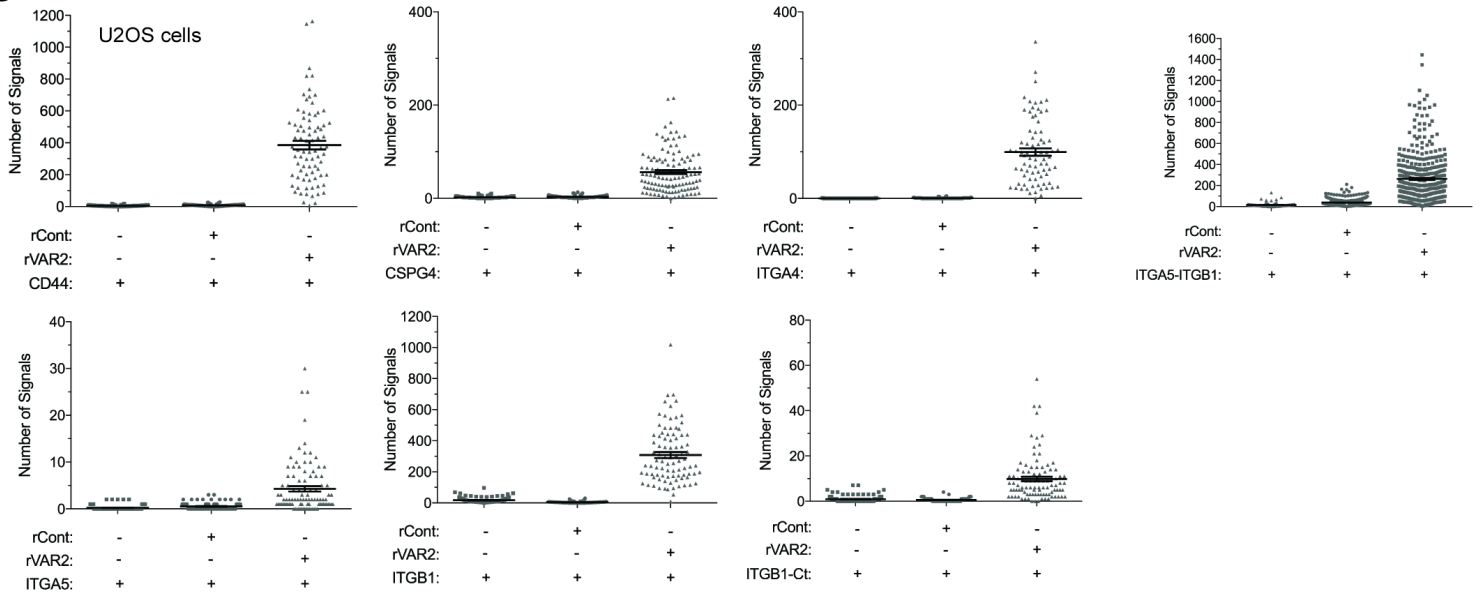

C

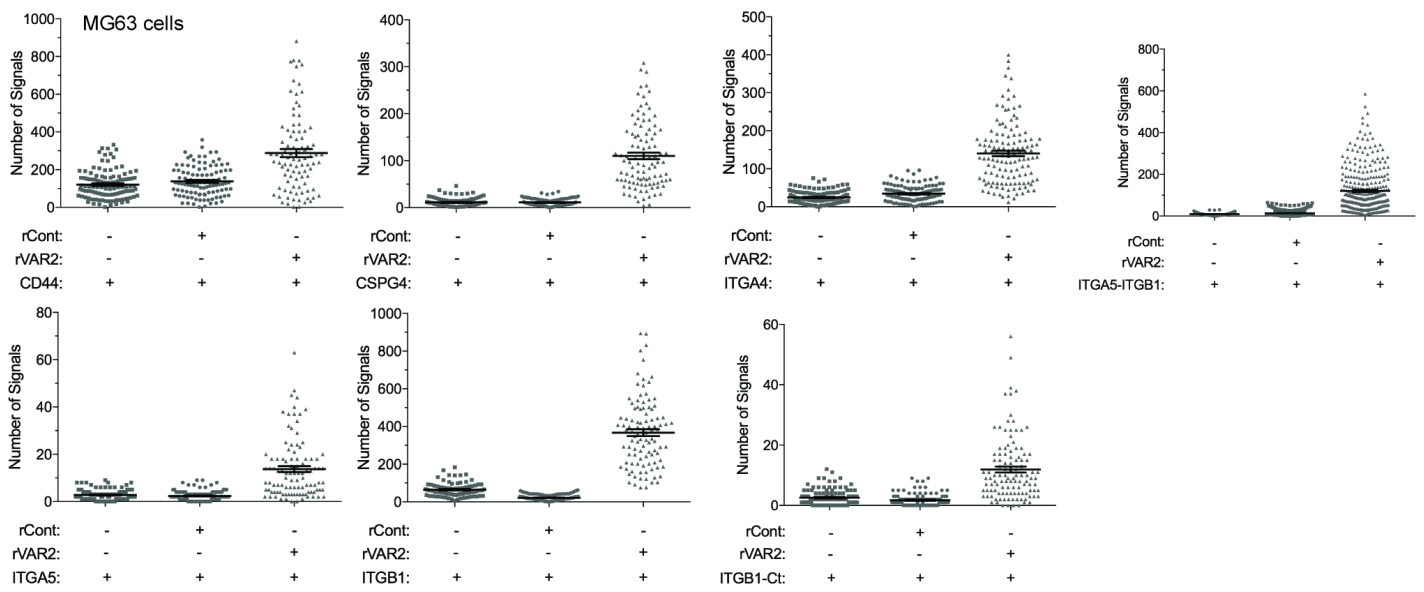

Supplement: NIHMS816925-supplement-2.pdf [file NIHMS816925-supplement-2.pdf]
